# Supplementary material for: Mung bean peptides promote glucose uptake via Jak2 activation in L6 myotubes
Source: Royal Society of Chemistry journal article supplement (doi:10.1039/d3fo00836c), 2023-01-01
Supplement: d3fo00836c1.pdf [file d3fo00836c1.pdf]

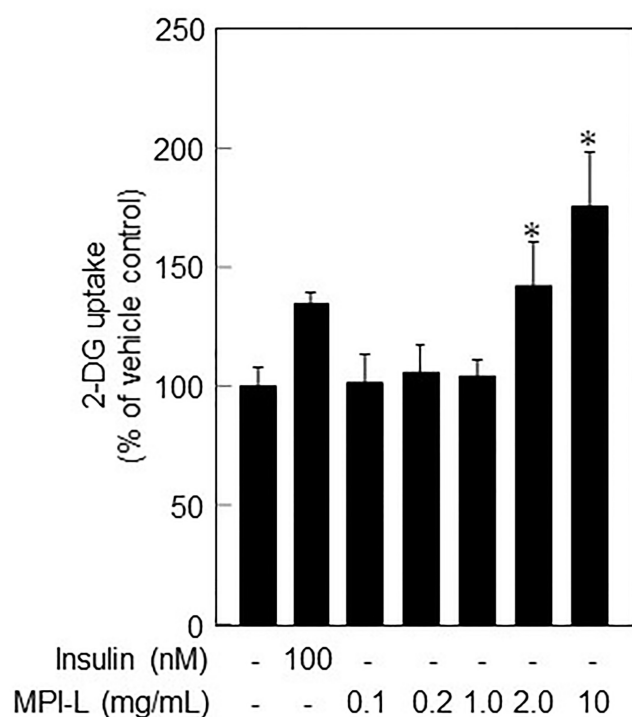

### Supplementary Figure S1 Effect of MPI-L on glucose uptake in L6 myotubes

(A) MPI-L significantly induced glucose uptake in a dose-dependent manner. (B) MPI-L was fractionated by anion exchange column chromatography. Fraction II at 1.0 and 2.0 mg/mL significantly increased glucose uptake in L6 myotubes. (C) Fraction II was further subjected to a gel filtration chromatography. Fraction II-I at 1.0 and 2.0 mg/mL significantly increased glucose uptake in L6 myotubes. (D) Fraction II-I was subsequently subjected to reverse phase high performance liquid chromatography. Fraction II-I-VI at 1.0 and 2.0 mg/mL increased glucose uptake. Data are presented as the means  $\pm$  SD (n=3). An asterisk indicates statistical significance from the control treatment ( $p < 0.05$ ) by Dunnett's test.
