# Supplementary material for: Mung bean peptides promote glucose uptake via Jak2 activation in L6 myotubes
Source: Royal Society of Chemistry journal article supplement (doi:10.1039/d3fo00836c), 2023-01-01
Supplement: d3fo00836c2.pdf [file d3fo00836c2.pdf]

A

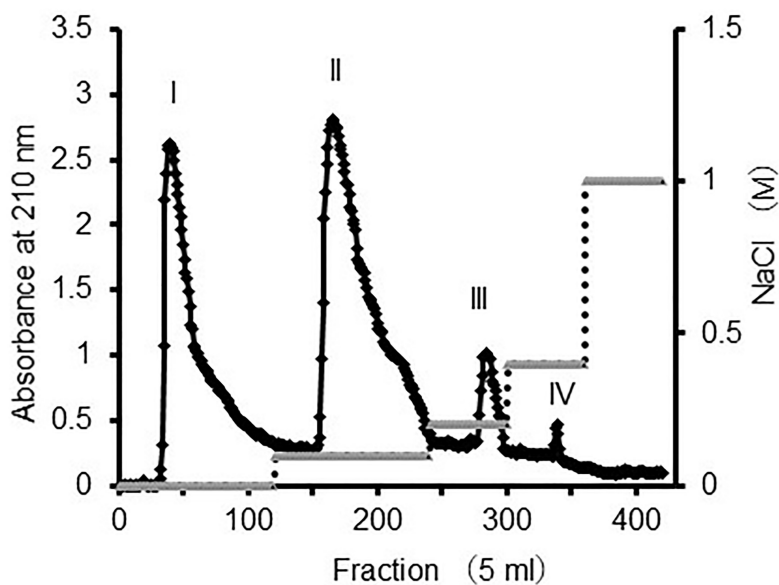

B

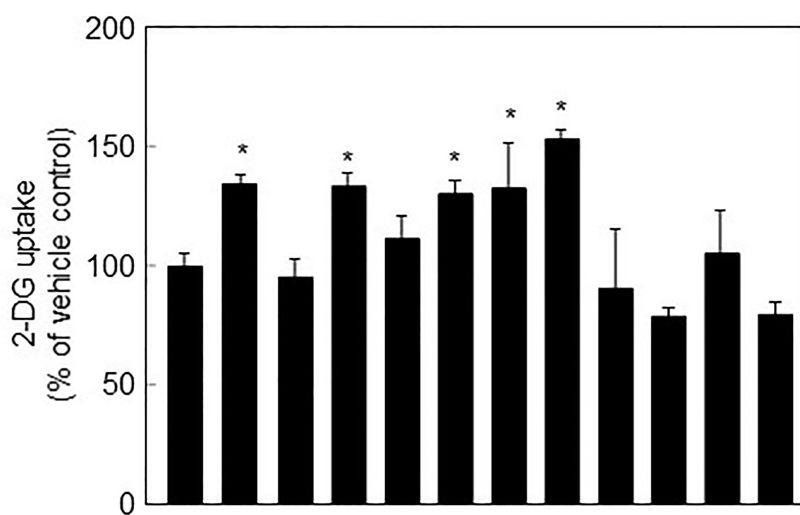

|                      |   |     |     |     |     |     |     |     |     |     |     |
|----------------------|---|-----|-----|-----|-----|-----|-----|-----|-----|-----|-----|
| Insulin (nM)         | - | 100 | -   | -   | -   | -   | -   | -   | -   | -   | -   |
| MPI-L (mg/mL)        | - | -   | 1.0 | 2.0 | -   | -   | -   | -   | -   | -   | -   |
| Fraction I (mg/mL)   | - | -   | -   | -   | 1.0 | 2.0 | -   | -   | -   | -   | -   |
| Fraction II (mg/mL)  | - | -   | -   | -   | -   | -   | 1.0 | 2.0 | -   | -   | -   |
| Fraction III (mg/mL) | - | -   | -   | -   | -   | -   | -   | -   | 1.0 | 2.0 | -   |
| Fraction IV (mg/mL)  | - | -   | -   | -   | -   | -   | -   | -   | -   | -   | 1.0 |
|                      |   |     |     |     |     |     |     |     |     |     | 2.0 |

**Supplementary Figure S2 Effect of fraction II on glucose uptake in L6 myotubes**

(A) MPI-L was fractionated on DEAE anion exchange column chromatography. (B) Fraction II at 1.0 and 2.0 mg/mL significantly increased glucose uptake in L6 myotubes. Data are presented as the means  $\pm$  SD (n=3). An asterisk indicates statistical significance from the control treatment ( $p < 0.05$ ) by Dunnett's test.
