# Supplementary material for: Mung bean peptides promote glucose uptake via Jak2 activation in L6 myotubes
Source: Royal Society of Chemistry journal article supplement (doi:10.1039/d3fo00836c), 2023-01-01
Supplement: d3fo00836c3.pdf [file d3fo00836c3.pdf]

A

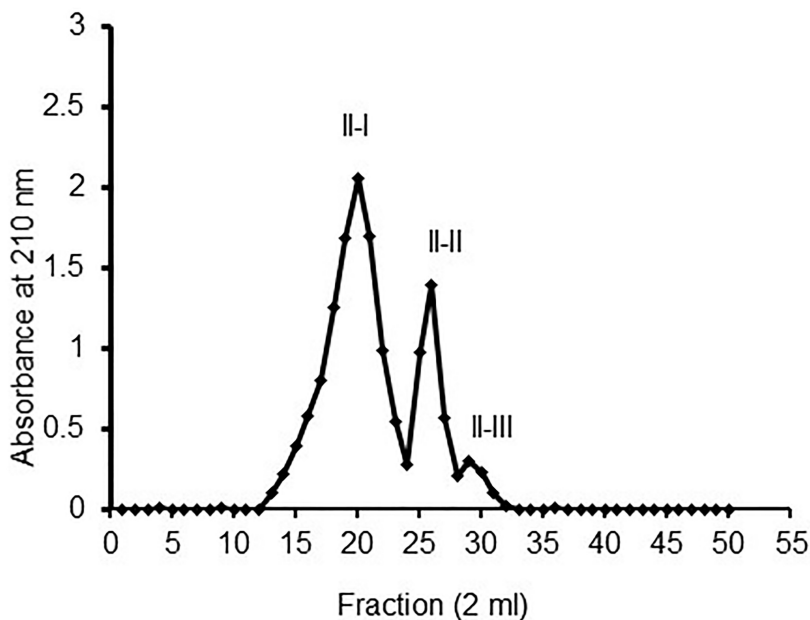

B

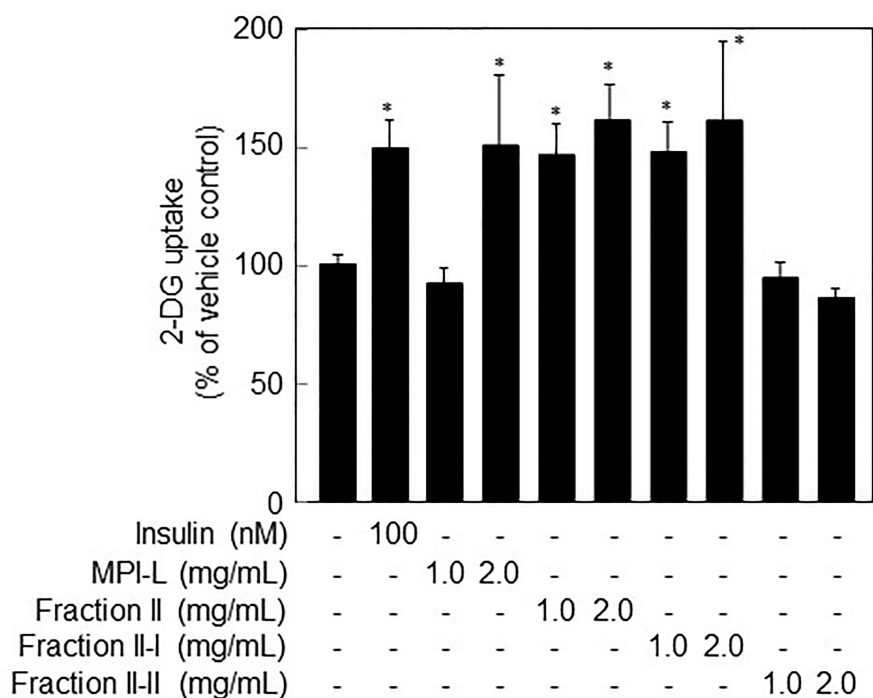

**Supplementary Figure S3 Effect of fraction II-I on glucose uptake in L6 myotubes**

(A) Fraction II was subjected to a gel filtration chromatography. (B) Fraction II-I at 1.0 and 2.0 mg/mL significantly increased glucose uptake in L6 myotubes. Data are presented as the means  $\pm$  SD (n=3). An asterisk indicates statistical significance from the control treatment ( $p < 0.05$ ) by Dunnett's test.
