# Supplementary material for: Mung bean peptides promote glucose uptake via Jak2 activation in L6 myotubes
Source: Royal Society of Chemistry journal article supplement (doi:10.1039/d3fo00836c), 2023-01-01
Supplement: d3fo00836c4.pdf [file d3fo00836c4.pdf]

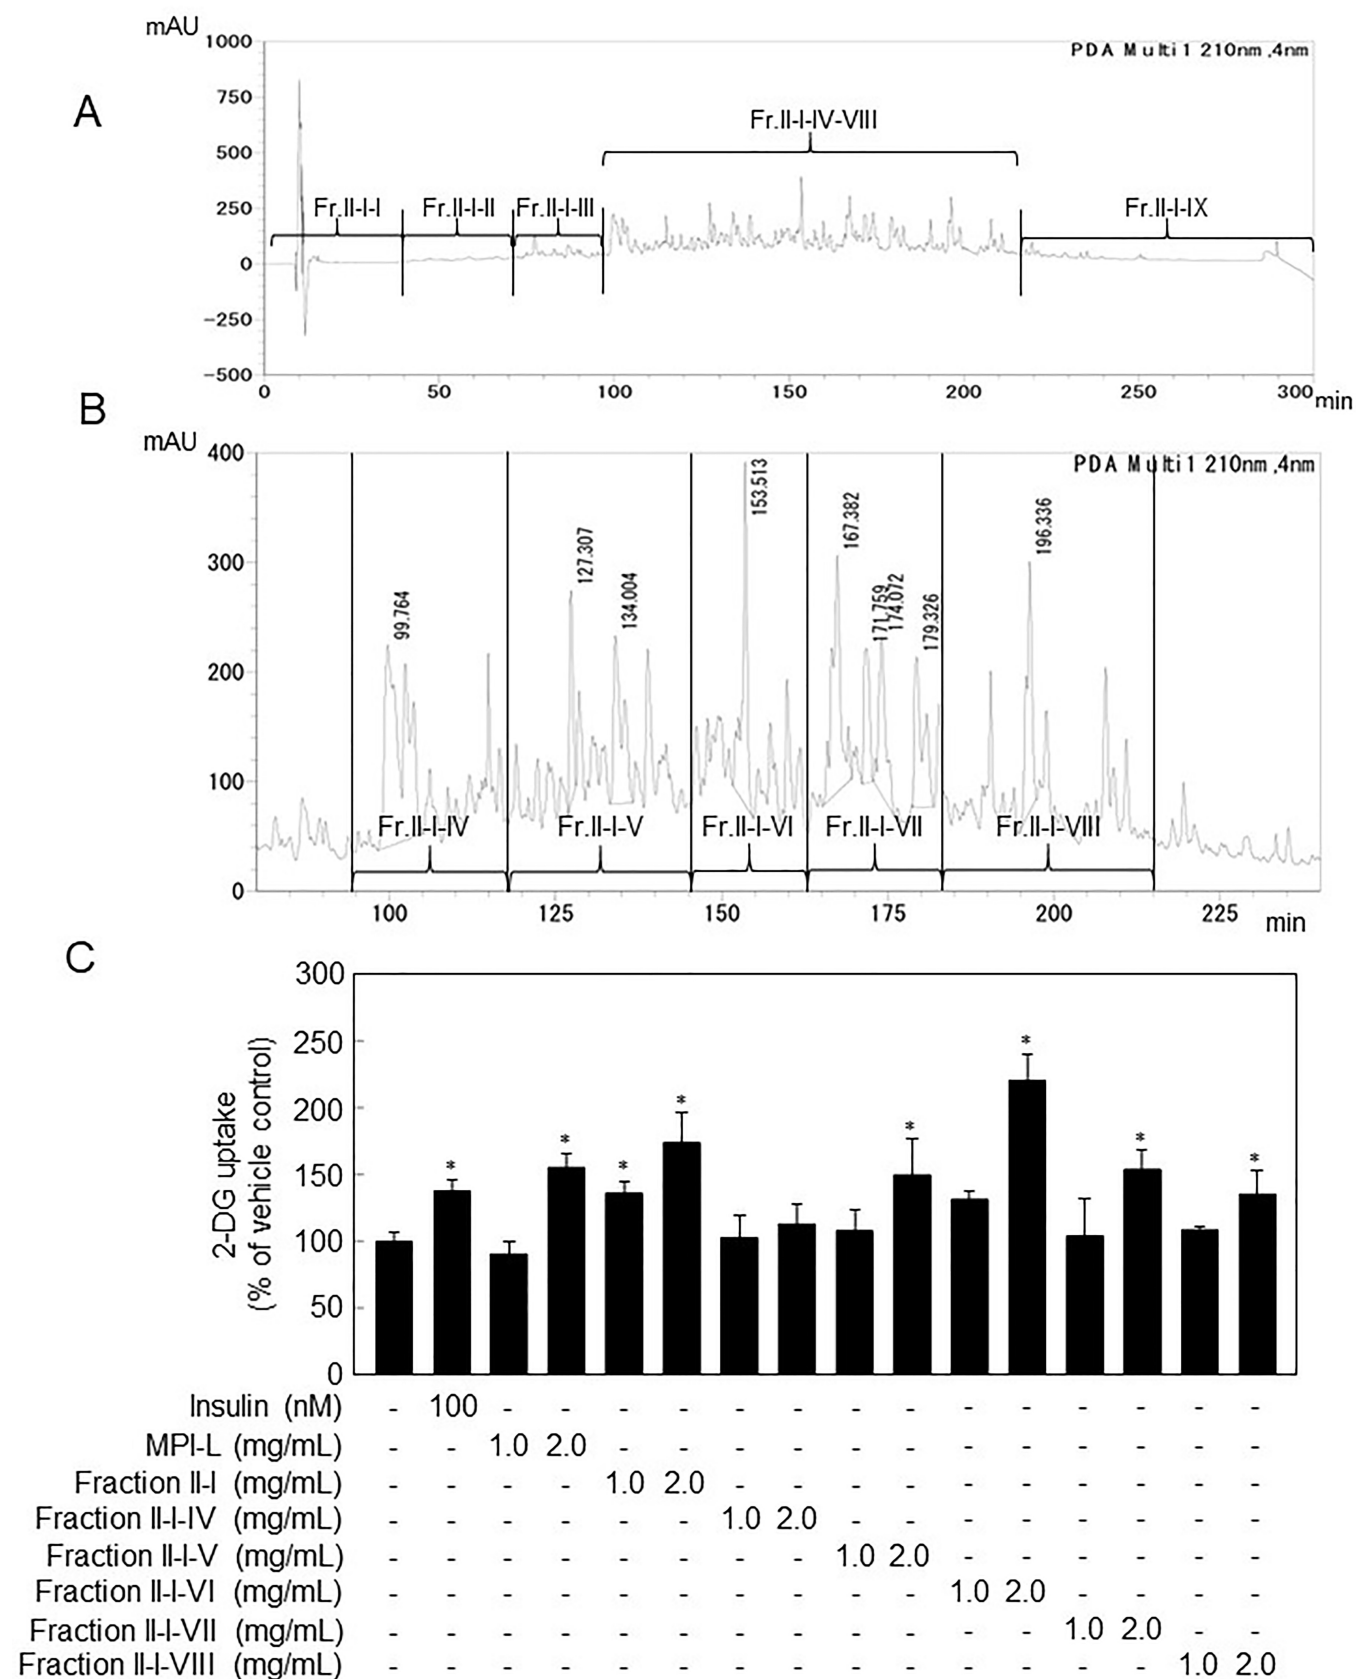

**Supplementary Figure S4 Effect of fraction II-I-VI on glucose uptake in L6 myotubes**

(A,B) Fraction II-I was subjected to reverse phase high performance liquid chromatography. Fraction II-I-VI at 2.0 mg/mL increased glucose uptake. Data are presented as the means  $\pm$  SD (n=3). An asterisk indicates statistical significance from the control treatment ( $p < 0.05$ ) by Dunnett's test.
