# Supplementary material for: Mung bean peptides promote glucose uptake via Jak2 activation in L6 myotubes
Source: Royal Society of Chemistry journal article supplement (doi:10.1039/d3fo00836c), 2023-01-01
Supplement: d3fo00836c5.pdf [file d3fo00836c5.pdf]

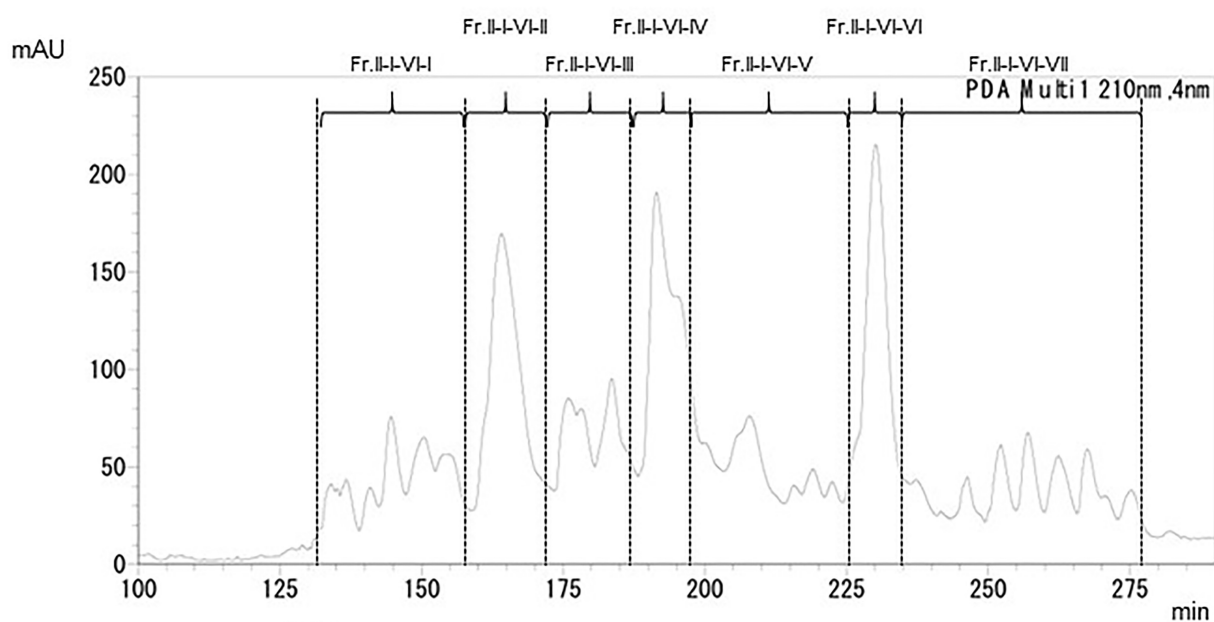

B

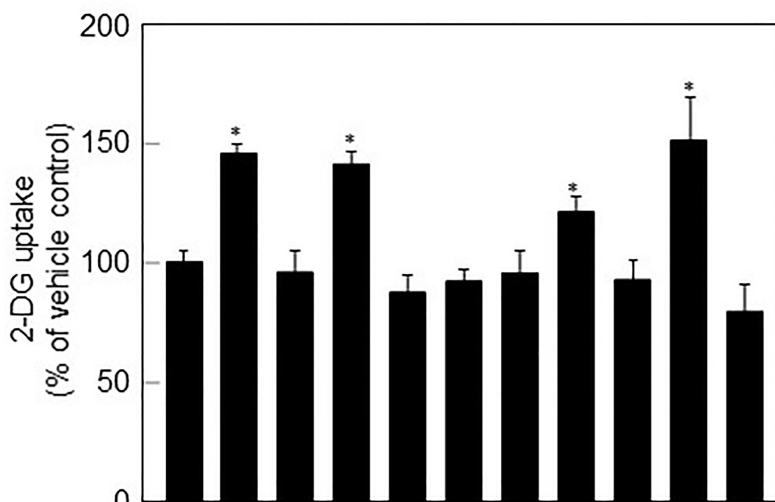

|                              |     |     |     |     |     |     |     |     |     |     |     |   |   |   |   |
|------------------------------|-----|-----|-----|-----|-----|-----|-----|-----|-----|-----|-----|---|---|---|---|
| Insulin (nM)                 | - 1 | 100 | 2   | -   | 3   | -   | 4   | -   | 5   | -   | 6   | - | 7 | - | 8 |
| MPI-L (mg/mL)                | -   | -   | 1.0 | -   | -   | -   | -   | -   | -   | -   | -   | - | - | - | - |
| Fraction II-I-VI (mg/mL)     | -   | -   | -   | 2.0 | -   | -   | -   | -   | -   | -   | -   | - | - | - | - |
| Fraction II-I-VI-I (mg/mL)   | -   | -   | -   | -   | 2.0 | -   | -   | -   | -   | -   | -   | - | - | - | - |
| Fraction II-I-VI-II (mg/mL)  | -   | -   | -   | -   | -   | 2.0 | -   | -   | -   | -   | -   | - | - | - | - |
| Fraction II-I-VI-III (mg/mL) | -   | -   | -   | -   | -   | -   | 2.0 | -   | -   | -   | -   | - | - | - | - |
| Fraction II-I-VI-IV (mg/mL)  | -   | -   | -   | -   | -   | -   | -   | 2.0 | -   | -   | -   | - | - | - | - |
| Fraction II-I-VI-V (mg/mL)   | -   | -   | -   | -   | -   | -   | -   | -   | 2.0 | -   | -   | - | - | - | - |
| Fraction II-I-VI-VI (mg/mL)  | -   | -   | -   | -   | -   | -   | -   | -   | -   | 2.0 | -   | - | - | - | - |
| Fraction II-I-VI-VII (mg/mL) | -   | -   | -   | -   | -   | -   | -   | -   | -   | -   | 2.0 | - | - | - | - |

**Supplementary Figure S5 Effect of fraction II-I-VI-VI on glucose uptake in L6 myotubes**

(A) Fraction II-I-VI was subsequently subjected to reverse phase high performance liquid chromatography. Fraction II-I-VI-VI at 1.0 mg/mL increased glucose uptake. Data are presented as the means  $\pm$  SD (n=3). An asterisk indicates statistical significance from the control treatment ( $p < 0.05$ ) by Dunnett's test.
